# Supplementary material for: Bifidobacterium pseudocatenulatum capsular exopolysaccharide enhances systemic anti-tumour immunity in pre-clinical breast cancer
Source: Research Square preprint supplement (doi:10.21203/rs.3.rs-9946512/v1), 2026-06-10
Supplement: Supplementary file 1 [file 2a5d648929907b051b324fef.docx]

**KEY RESOURCES TABLE**

| **REAGENT or RESOURCE** | **SOURCE** | **IDENTIFIER** |
| --- | --- | --- |
| **Antibodies** | | |
| Rat anti-mouse CD45, PerCP-Cy5.5 (clone 30-F11) | Thermo Fisher | Cat# 45-0451-82; Clone 30-F11; RRID: AB_1107002 |
| Rat anti-mouse CD3, APC (clone 17A2) | BioLegend | Cat# 100236; Clone 17A2; RRID: AB_2561456 |
| Rat anti-mouse CD8a, APC-Cy7 (clone 53-6.7) | Thermo Fisher | Cat# A15386; Clone 53-6.7; RRID: AB_2534400 |
| Rat anti-mouse CD44, eFluor450 (clone 1M7) | Thermo Fisher | Cat# 48-0441-82; Clone 1M7; RRID: AB_1272246 |
| Rat anti-mouse CD62L, BV605 (clone MEL-14) | BioLegend | Cat# 104438; Clone MEL-14; RRID: AB_2563058 |
| Mouse anti-mouse NK1.1, PE-Cy7 (clone PK136) | BioLegend | Cat# 108714; Clone PK136; RRID: AB_389364 |
| Rat anti-mouse IFNγ, BV711 (clone XMG1.2) | BioLegend | Cat# 505836; Clone XMG1.2; RRID: AB_2650928 |
| Rat anti-mouse IL-2, PerCP-Cy5.5 (clone JES6-5H4) | Thermo Fisher | Cat# 45-7021-80; Clone JES6-5H4; RRID: AB_925756 |
| Rat anti-mouse FOXP3, eFluor450 (clone FJK-16s) | Thermo Fisher | Cat# 48-5773-82; Clone FJK-16s; RRID: AB_1518812 |
| Rat anti-mouse CD45, BUV395 (clone 30-F11) | BD Biosciences | Cat# 564279; Clone 30-F11; RRID: AB_2651134 |
| Rat anti-mouse CD4, PE (clone GK1.5) | Thermo Fisher | Cat# 12-0041-82; Clone GK1.5; RRID: AB_465506 |
| Rat anti-mouse FOXP3, AF700 (clone FJK-16s) | Thermo Fisher | Cat# 56-5773-82; Clone FJK-16s; RRID: AB_1210557 |
| Mouse anti-mouse Granzyme B, PE-Cy7 (clone NGZB) | Thermo Fisher | Cat# 25-8898-82; Clone NGZB; RRID: AB_10853339 |
| Rat anti-mouse CD11b, BV605 (clone M1/70) | BD Biosciences | Cat# 563015; Clone M1/70; RRID: AB_2737951 |
| Rat anti-mouse Ly6C, eFluor450 (clone HK1.4) | Thermo Fisher | Cat# 48-5932-82; Clone HK1.4; RRID: AB_10805519 |
| Rat anti-mouse Ly6G, APC-Cy7 (clone 1A8) | BD Biosciences | Cat# 560600; Clone 1A8; RRID: AB_1727561 |
| Rat anti-mouse F4/80, APC (clone BM8) | Thermo Fisher | Cat# 17-4801-82; Clone BM8; RRID: AB_2784648 |
| Rat anti-mouse MHCII (I-A/I-E), PE-Cy7 (clone M5/114.15.2) | Thermo Fisher | Cat# 25-5321-82; Clone M5/114.15.2; RRID: AB_10870792 |
| Rat anti-mouse CD206, FITC (clone CO68C2) | BioLegend | Cat# 141704; Clone CO68C2; RRID: AB_10901166 |
| Hamster anti-mouse CD11c, BUV395 (clone HL3) | BD Biosciences | Cat# 564080; Clone HL3; RRID: AB_2738580 |
| Armenian hamster anti-mouse CD103, BV711 (clone 2E7) | BioLegend | Cat# 121435; Clone 2E7; RRID: AB_2686970 |
| Rat anti-mouse PD-1, PE-Cy7 (clone 29F.1A12) | BioLegend | Cat# 135216; Clone 29F.1A12; RRID: AB_10689635 |
| Armenian hamster anti-mouse CD80, Super Bright 600 (clone GL1) | Thermo Fisher | Cat# 63-0862-82; Clone GL1; RRID: AB_2662862) |
| Rat anti-mouse CD86, BV421 (clone 16-10A1) | BD Biosciences | Cat# 562611; Clone 16-10A1; RRID: AB_2737675 |
| Rat anti-mouse CD107a, eFluor450 (clone 104B) | Thermo Fisher | Cat# 48-1071-82; Clone 104B; RRID: AB_11219687 |
| Mouse anti-GFP, PE-Cy7 (clone FM264G) | BioLegend | Cat# 338014; Clone FM264G; RRID: AB_2860870 |
| Rat anti-mouse IL-4, PerCP-Cy5.5 (clone 11B11) | BioLegend | Cat# 504123; Clone 11B11; RRID: AB_2561564 |
| Rat anti-mouse TNFα, PE (clone MP6-XT22) | BioLegend | Cat# 506306; Clone MP6-XT22; RRID: AB_315427 |
| InVivoMAb anti-mouse PD-1 (clone 29F.1A12) | Bio X Cell | Cat# BE0273; Clone 29F.1A12; RRID: AB_2687796 |
| InVivoMAb anti-mouse CD8α (clone 2.43) | Bio X Cell | Cat# BE0061; Clone 2.43; RRID: AB_1125541 |
| Rat anti-mouse SIRPα, PE (clone P84) | BioLegend | Cat# 144011; Clone 2.43; RRID: AB_2563549 |
| Rat anti-mouse XCR1, BV785 (clone ZET) | BioLegend | Cat# 148225; Clone ZET; RRID: AB_2783119 |
| Rat anti-mouse CCR7, AF488 (clone 4B12) | BioLegend | Cat# 120112; Clone 4B12; RRID: AB_492842 |
| Rat anti-mouse iNOS, PE (clone W16030C) | BioLegend | Cat# 696805; Clone W16030C; RRID: AB_2876745 |
| Rat anti-mouse PD-L1, BV711 (clone 10F.9G2) | BioLegend | Cat# 124319; Clone 10F.9G2; RRID: AB_2563619 |
| Rat anti-mouse Arginase 1, APC (clone A1exF5) | Thermo Fisher | Cat# 17-3697-82; Clone A1exF5; RRID: AB_2734835 |
| **Bacterial and virus strains** | | |
| Bifidobacterium pseudocatenulatum 210 | In-house strain collection; this paper | N/A |
| Bifidobacterium pseudocatenulatum DSM20438 | DSMZ | DSM 20438 |
| Bifidobacterium longum subsp. longum B71 | In-house strain collection; Kujawska et al. (2020) | N/A |
| Bifidobacterium bifidum LH80 | In-house strain collection; Lawson et al. (2020) | N/A |
| Bifidobacterium choerinum LH506 | In-house strain collection; Lawson et al. (2020) | N/A |
| Bifidobacterium pseudocatenulatum LH14 | In-house strain collection; this paper | N/A |
| Bifidobacterium longum subsp. longum NCIMB 8809 | Public strain collection / NCIMB | NCIMB 8809 |
| **Biological samples** | | |
| Human fecal samples from BEAM cohort participants | This paper; Breast hEalth And Microbiota study | Ethics: FMH 201819-092HT; HTA license 11208 |
| **Chemicals, peptides, and recombinant proteins** | | |
| Matrigel (growth factor reduced) | Merck | Cat# CLS356230 |
| Cyclophosphamide | Merck | Cat# C0768 |
| Recombinant mouse IL-4 | Bio-Techne | Cat# 404-ML |
| Recombinant mouse GM-CSF | Bio-Techne | Cat# 414-ML |
| Alexa Fluor 647 hydrazide | Thermo Fisher | Cat# A20502 |
| Sodium periodate | Merck | Cat# 71859 |
| DNase I | Merck | Cat# 4716728001 |
| Pronase E | Merck | Cat# 1.07433 |
| Collagenase D | Merck | Cat# 11088858001 |
| Collagenase IV | Thermo Fisher | Cat# 17104019 |
| Collagenase I | Thermo Fisher | Cat# 17100017 |
| Hyaluronidase | Sigma-Aldrich | Cat# 389561 |
| Peracetic acid | Merck | Cat# 1.07222 |
| Amphotericin-B | Merck | Cat# A2411 |
| Ampicillin | Merck | Cat# A9518 |
| Vancomycin Hydrochloride | Thermo Fisher | Cat# 11956911 |
| Metronidazole | Merck | Cat# M3761 |
| Neomycin trisulfate salt hydrate | Merck | Cat# N1876 |
| eBioscience Foxp3 / Transcription Factor Staining Buffer Set | Thermo Fisher | Cat# 00-5523-00 |
| Fixable Live/Dead Red | Thermo Fisher | Cat# L34972 |
| Fc-receptor blocking reagent | Thermo Fisher | Cat# 14-9161-73 |
| LightCycler 480 SYBR Green I Master Mix | Roche | Cat# 04707516001 |
| MRS-agar (Oxoid) | Thermo Fisher | Cat# P05047A |
| MRS broth (Oxoid) | Thermo Fisher | Cat# CM0359B |
| DMEM, high glucose medium | Thermo Fisher | Cat# 11965092 |
| Red blood cell lysis buffer | Thermo Fisher | Cat# 00-4300-54 |
| RPMI 1640 medium | Thermo Fisher | Cat# 11875093 |
| Percoll | Merck | Cat# P4937 |
| 2-mercaptoethanol | Thermo Fisher | Cat# 21985023 |
| phorbol 12-myristate 13-acetate | Merck | Cat# P8139 |
| ionomycin | Merck | Cat# I0634 |
| brefeldin A | Merck | Cat# B7651 |
| Columbia blood agar | Thermo Fisher | Cat# PB1224E |
| Brain heart infusion agar | Thermo Fisher | Cat# CM1136B |
| Amicon regenerated-cellulose centrifugal filter units (10kDa mw cut-off) | Thermo Fisher | Cat# UFC510024 |
| **Critical commercial assays** | | |
| FastDNA SPIN Kit for Soil | MP Biomedicals | Cat# 116560200-CF |
| Qubit dsDNA Broad Range Assay Kit | Thermo Fisher | Cat# Q33230 |
| RNeasy Micro Kit | Qiagen | Cat# 74004 |
| DC Protein Assay | Bio-Rad | Cat# 5000116 |
| IL-12p70 DuoSet ELISA | R&D Systems / Bio-Techne | Cat# DY419-05 |
| CCL19/MIP-3β DuoSet ELISA | R&D Systems / Bio-Techne | Cat# DY440 |
| CCL21/6Ckine DuoSet ELISA | R&D Systems / Bio-Techne | Cat# DY457 |
| Ancillary Reagent Kit 2 | R&D Systems / Bio-Techne | Cat# DY008B |
| MxP Quant 500 Kit | Biocrates | Cat# 21094.12 |
| CD11c MicroBeads | Miltenyi Biotec | Cat# 130-125-835 |
| **Experimental models: Cell lines** | | |
| Mouse: BRPKp110 mammary tumour cells | This paper | N/A |
| Mouse: PyMT-BO1 mammary tumour cells | This paper | N/A |
| Mouse: 4T1 mammary tumour cells | This paper | RRID:CVCL_0125 |
| Mouse: E0771 mammary tumour cells | ATCC | RRID:CVCL_GR23 |
| **Experimental models: Organisms/strains** | | |
| Mouse: C57BL/6J | Originally The Jaxson Laboratory; now in-house colony | RRID: IMSR_JAX:000664 |
| Mouse: MMTV-PyMT: B6.FVB-Tg(MMTV-PyVT)634Mul/LellJ | The Jackson Laboratory | RRID: MGI:5493021 |
| Mouse: germ-free C57BL/6J | In-house gnotobiotic isolator colony | N/A |
| Mouse: BALB/cAnNCrl | Charles River | RRID: MGI:2683685 |
| **Oligonucleotides** | | |
| GroEL qPCR primers for B. pseudocatenulatum | Junick and Blaut (2012) | N/A |
| **Software and algorithms** | | |
| fastp v0.20/v0.22 | Chen et al. (2018) | https://github.com/OpenGene/fastp |
| BBMap | Brian Bushnell, JGI | https://sourceforge.net/projects/bbmap/ |
| Kraken2 | Wood et al. | https://github.com/DerrickWood/kraken2 |
| Bracken | Lu et al. | https://ccb.jhu.edu/software/bracken/ |
| FlowJo | Becton Dickinson | https://www.flowjo.com |
| GraphPad Prism 11 | GraphPad Software | https://www.graphpad.com |
| MetaboAnalyst 4.0 | Chong et al. (2019) | https://www.metaboanalyst.ca |
| MetaboAnalyst 5.0 | Pang et al. (2022) | https://www.metaboanalyst.ca |
| ImageJ v1.52a | Schneider et al. | https://imagej.nih.gov/ij/ |
| FastQC | Babraham Bioinformatics | https://www.bioinformatics.babraham.ac.uk/projects/fastqc/ |
| Trimmomatic | Bolger et al. (2014) | http://www.usadellab.org/cms/?page=trimmomatic |
| STAR v2.5.2b | Dobin et al. | https://github.com/alexdobin/STAR |
| featureCounts v1.5.0-p3 | Liao et al. (2014) | http://subread.sourceforge.net |
| DESeq2 v1.20.0 | Love et al. (2014) | https://bioconductor.org/packages/DESeq2 |
| clusterProfiler | Yu et al. (2012) | https://bioconductor.org/packages/clusterProfiler |
| GSEA | Broad Institute | https://www.gsea-msigdb.org/gsea/index.jsp |
| Unicycler v0.5.0 | Wick et al. (2017) | https://github.com/rrwick/Unicycler |
| CheckM v1.2.3 | Parks et al. (2015) | https://github.com/Ecogenomics/CheckM |
| Prokka v1.14.6 | Seemann (2014) | https://github.com/tseemann/prokka |
| BLAST+ v2.13.0 | Camacho et al. (2009) | https://blast.ncbi.nlm.nih.gov/Blast.cgi |
| clinker and clustermap.js | Gilchrist and Chooi (2021) | https://github.com/gamcil/clinker |
| **Other** | | |
| Purified capsular EPS from B. pseudocatenulatum 210 | This paper | N/A |
| Purified EPS from B. longum B71 | This paper | N/A |
| AF647-labelled 210 EPS | This paper | N/A |
| Illumina NextSeq 500 | Illumina | N/A |
| Illumina NovaSeq | Illumina | N/A |
| Agilent TapeStation | Agilent | N/A |
| Agilent Bioanalyzer 2100 | Agilent | N/A |
| BD LSR Fortessa flow cytometer | BD Biosciences | N/A |
| CLARIOstar Plus plate reader | BMG LABTECH | N/A |
| In-Vivo Xtreme optical imaging system | Bruker | N/A |
| LightCycler 480 | Roche | N/A |
| VersaMax microplate reader | Molecular Devices | N/A |
| MSD QuickPlex SQ 120 imager | MSD | N/A |
| TissueLyser LT | Qiagen | N/A |
| FastPrep-24 system / MPBio FastPrep bead beater | MP Biologicals | N/A |
