# Supplementary material for: Bifidobacterium pseudocatenulatum capsular exopolysaccharide enhances systemic anti-tumour immunity in pre-clinical breast cancer
Source: Research Square preprint supplement (doi:10.21203/rs.3.rs-9946512/v1), 2026-06-10
Supplement: Supplementary file 2 [file d8920522f4fe48bb85044a9d.docx]

**Table 1. List of flow cytometry gating strategies for the identification of immune cell populations**

| Population | Gating strategy |
| --- | --- |
| Lymphoid cells | Singlet, Live, CD45+, CD3+ |
| T helper cells | Singlet, Live, CD45+, CD3+, CD4+, CD8- |
| CD8+ T cells | Singlet, Live, CD45+, CD3+, CD4-, CD8+ |
| CD8+ effector memory | Singlet, Live, CD45+, CD3+, CD4-, CD8+, CD62L-, CD44+ |
| CD8+ central memory | Singlet, Live, CD45+, CD3+, CD4-, CD8+, CD62L+, CD44+ |
| Naïve CD8 | Singlet, Live, CD45+, CD3+, CD4-, CD8+, CD62L+, CD44- |
| Treg cells | Singlet, Live, CD45+, CD3+, CD4+, CD8-, FOXP3+ |
| NK cells | Singlet, Live, CD45+, CD3-, NK1.1+ |
| Myeloid cells | Singlet, Live, CD45+, CD11b+ |
| M-MDSCs | Singlet, Live, CD45+, CD11b+, Ly6C+, Ly6G- |
| G-MDSCs | Singlet, Live, CD45+, CD11b+, Ly6C-, Ly6G+ |
| Macrophages | Singlet, Live, CD45+, CD11b+, Ly6C-, F4/80+ |
| Dendritic cells (DCs) | Singlet, Live, CD45+, CD11c+ |
| cDC1 cells | Singlet, Live, CD45+, CD11c+, MHCII+, CD103hi, CD11blo |
| cDC2 cells | Singlet, Live, CD45+, CD11c+, MHCII+, CD103lo, CD11bhi |
| Gut cDC1 cells | Singlet, Live, CD45+, CD11c+, MHCII+, CD103hi, CD11blo, XCR1+ |
| Gut cDC2 cells | Singlet, Live, CD45+, CD11c+, MHCII+, CD103lo, CD11bhi, SIRPα+ |
